# Supplementary material
Source: Springer Nature journal article supplement (https://www.springermedizin.de/resource/supplementary/12974_2011_438_MOESM8_ESM.pdf/9601288)

(A) NGF

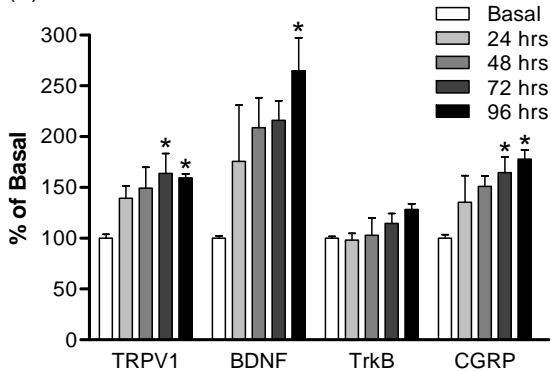

(B) BDNF

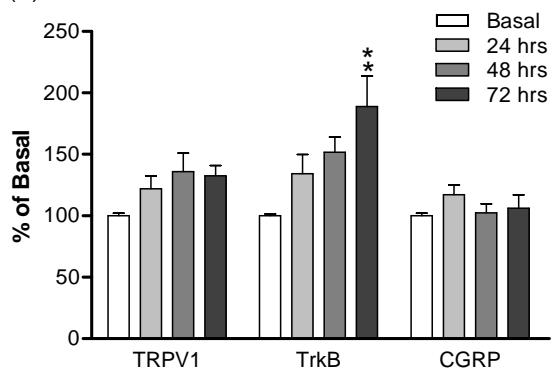

Supplement: MOESM8 [file 9601288]
